# Supplementary material
Source: PubMed Central journal article supplement (PMC7398659)
Supplement: mmc1.pdf [file mmc1.pdf]

# THE LANCET

## Child & Adolescent Health

### Supplementary appendix

This appendix formed part of the original submission and has been peer reviewed. We post it as supplied by the authors.

Supplement to: Panovska-Griffiths J, Kerr CC, Stuar RM, et al. Determining the optimal strategy for reopening schools, the impact of test and trace interventions, and the risk of occurrence of a second COVID-19 epidemic wave in the UK: a modelling study. *Lancet Child Adolesc Health* 2020; published online August 3. [https://doi.org/10.1016/S2352-4642\(20\)30250-9](https://doi.org/10.1016/S2352-4642(20)30250-9).

## Supplementary material to

### Determining the optimal strategy for reopening schools, the impact of test and trace interventions, and the risk of occurrence of a second COVID-19 epidemic wave in the UK: a modelling study

Jasmina Panovska-Griffiths<sup>1,2,3,\*</sup>, Cliff C. Kerr<sup>4,5</sup>, Robyn M. Stuart<sup>6,7</sup>, Dina Mistry<sup>4</sup>, Daniel J. Klein<sup>4</sup>, Russell M. Viner<sup>8§</sup>, Chris Bonell<sup>9§</sup>

<sup>1</sup>Department of Applied Health Research, UCL, London, UK

<sup>2</sup>Institute for Global Health, UCL, London, UK

<sup>3</sup>The Queen's College, Oxford University

<sup>4</sup>Institute for Disease Modeling, Bellevue, WA, USA

<sup>5</sup>University of Sydney, Sydney, NSW, Australia

<sup>6</sup>University of Copenhagen, Copenhagen, Denmark

<sup>7</sup>Burnet Institute, Melbourne, VIC, Australia

<sup>8</sup>UCL Great Ormond St. Institute of Child Health, London

<sup>9</sup>Faculty of Public Health and Policy, London School of Hygiene and Tropical Medicine

\*Corresponding author: [j.panovska-griffiths@ucl.ac.uk](mailto:j.panovska-griffiths@ucl.ac.uk)

§=joint senior author

#### Methods

##### *Adaptation of Covasim model for this analysis*

In the simulations we used the Covasim model developed by the Institute of Disease Modelling, described in details in [1] with implementation material at <http://docs.covasim.org>. Covasim can be downloaded from <https://github.com/InstituteforDiseaseModeling/covasim> and the adaptation of Covasim for this study and the calibration parameter inference script are available at <https://github.com/Jasminapg/Covid-19-Analysis>.

Our adaptation involved parametrising Covasim to the UK context. We used demographic data to set the UK population to 67.86 million people with age distribution specific for the UK [2]. The model simulated a population of 100,000 with 1500<sup>1</sup> infectious individuals seeded on 21/01/2020, which we then rescaled to the UK population of 67.86 million. The model was ran between 21/02/2020 and 31/12/2021.

Covasim is an agent-based model where each individual is characterised as either susceptible, exposed to the virus but not infectious, infectious and can spread the virus, recovered from the virus (and assumed to be immune) and dead. Infectious people are also split into those that are asymptomatic, presymptomatic and within symptoms categorised as mild, severe and critical. Schematic of the model is shown in Figure 1 in the main manuscript. Publicly available data

---

<sup>1</sup> We explored this value together with the transmission probability and the % of symptomatic testing. We determined that the minimum number of infectious individuals we needed to seed on 21/01/2020 (10 days before the first reported case) was 1000 individuals so that an epidemic would occur. But in this case we were getting unrealistic values of R0 (between 3-6). We determined this value during the calibration process matching the simulated epidemic to the UK epidemic (i.e. matching reported cases and deaths associated with COVID-19 and R0 between 2-3 at the onset of the UK epidemic).

45 across a spectrum of parameters characterising SARS-CoV-2 virus were collated for  
46 parametrisation of Covasim and the core parameters used in the simulation are listed in tables  
47 S2 and S3<sup>2</sup>.

48  
49 Covasim has four available networks to describe the populations distribution and household,  
50 school, workplace sizes as reported in the UN Population Division, 2019. For the purposes of  
51 this study we used the hybrid network approach where each person in the population is assumed  
52 to have contacts in their household, school (for children), workplace (for adults) and  
53 community as described in [1]. With this approach, for each age group a population was drawn  
54 by Covasim according to an age distribution in the UK and each individual was randomly  
55 assigned to a household using data on household sizes. Specifically, children are assigned to  
56 school and adults to workplaces, and we specify the number of fixed daily contact. In this  
57 analysis we assumed Poisson-distributed daily contacts with means of 3 for households, and  
58 20 for schools, workplace and within the community contacts.

59  
60 Disease duration parameters, in days, used in simulations are listed in Table S2 while the age-  
61 linked disease parameters as odd ratios are listed in Table S3. In addition, the proportion of the  
62 infection that is symptomatic depends on the population age structure with more details in [1].  
63 Using the baseline parameters we simulated the UK COVID-19 epidemic over the period  
64 21/01/2020 and 31/12/2020 projecting the number of daily new infections, cumulative  
65 diagnosis and cumulative deaths.

66  
67 *Data on number of reported COVID-19 cases in the UK*

68  
69 To compare with the model projections, we collated publicly available data on COVID-19  
70 cases and associated deaths. The total number of confirmed cases of COVID-19 and COVID-  
71 19 associated deaths in the UK were collated between 21/02/2020 and 16/06/2020 from  
72 <https://coronavirus.data.gov.uk>.

73  
74 *School and society reopening scenarios*

75  
76 We model different scenarios of relaxing the lockdown in the UK by simulating reopening of  
77 schools, with some or all school years would go back to school at different times between June  
78 and September 2020, and proportional changes in work and community. Thus across scenarios  
79 we assume that increase in school transmission probability, workplace and community  
80 transmission probabilities would also increase respectively, to account for increased social  
81 mixing with reopening of schools.

82  
83 Within Covasim this can be implemented as an increase in transmission due to contacts  
84 proportional to the % of school years going back under different scenarios. We thus simulate  
85 different strategies of reopening school, work and society by scaling the transmission  
86 probability within home ( $\beta_h$ ), school ( $\beta_s$ ), work ( $\beta_w$ ) and community ( $\beta_c$ ). For example, we  
87 accounted for reduced transmission probability across all contacts by 10% due to a hygiene  
88 campaign in the UK between 16/02/2020 and 23/03/2020 and a large reduction (98% in school  
89 transmission, 80% in work and community transmission) with the imposing of physical  
90 distancing measures in the UK from 23/03/2020. We then simulated an increase in the  
91 appropriate scaling for transmission probability layers, when we model schools reopening  
92 according to different scenarios with changes listed in Table 1 of the main text. We note that

---

<sup>2</sup> Variation of these tables was presented in [2] and here we have adapted them to what we used in this analysis.

93 within the scenarios design we accounted for school closures during the summer holidays, half-  
94 term and Christmas and Easter holidays. We assume during any school holidays, the  
95 transmission in schools will be 0%, while the transmission at home may increase.

96  
97 We assumed that simultaneously to schools going back, there will be a society reopening with  
98 workplace and community contacts increased and hence probability of transmission due to  
99 contacts increased also. The exact percentages of change were chosen in discussion between  
100 co-authors. With uncertainty of what parts of society will reopen with schools reopen, it was a  
101 modelling assumption that reopening of society will be proportional to the increase in schools  
102 years going back when schools reopen. For example, with phased school reopening from 1<sup>st</sup>  
103 June, transmission at work and within community was assumed to be 40% (an increase of 20%  
104 to the situation during lockdown analogous to the increase in schools 3/13 schools years).  
105 Similarly, during term time after September 2020, the work transmission was assumed to be  
106 70%, based on the assumption that 30% of the workforce will continue to work from home for  
107 the foreseeable future (personal communication with policy decision makers in the UK); while  
108 during school holidays we assumed the work transmission will be 50%. The community  
109 transmission probability was set to be 70% during school holidays and 90% during term.

110  
111 We also assumed that the household contact rate and hence transmission probability would be  
112 reduced once schools reopen and remain as such during term-time. We made an assumption  
113 that this reduction would be around 29% using the information from Google movement data  
114 showing 29% increase in mobility trends for people's places of residence in the UK during the  
115 lock-down. We note that this modelling assumption represents the upper limit in this reduction.  
116 Exact details across scenarios are shown in the table of the main manuscript.

### 117 *Testing, tracing and isolation scenarios*

118  
119  
120 Testing in the model can be incorporated in two ways: (a) by assigning a daily number of tests  
121 assigned to the population, assigning test specificity and sensitivity and setting an odds ratio  
122 for testing symptomatic person or (b) by assigning probability of testing symptomatic,  
123 asymptomatic or quarantined people, assigning probability of true positive test, probability of  
124 the person being lost to follow up and days for test result to be known. In absence of exact  
125 number of daily tests, for this analysis we used the testing method that allows the user to specify  
126 the probabilities for different cohorts of people of receiving a test on each day.

### 127 *Testing + isolation (TI) strategy between March 23, 2020 and May 31, 2020*

128  
129  
130 Until May 31, 2020 testing for COVID-19 in the UK was in people with severe symptoms and  
131 in hospital with some testing of essential key workers such as the NHS staff. (details in  
132 <https://www.gov.uk/guidance/coronavirus-covid-19-information-for-the-public> (accessed May  
133 27, 2020). People who test positive were then asked to isolate. In addition people with  
134 symptoms were asked to self-isolate to prevent transmission. Based on this, we simulated the  
135 strategy between until May 31, 2020 to comprise of promoting self-isolation of people with  
136 symptoms, some testing of symptomatic people and isolation of positive diagnosis as well as  
137 testing a small number of people that are asymptomatic (e.g. NHS key workers).

138  
139 We implemented this in in the model by specifying the probability  $p_s$  with which symptomatic  
140 people receive a test each day and a probability  $p_{as}$  with which asymptomatic people receive  
141 a test each day. In the latter case, we used the estimate from  
142 <https://www.gov.uk/guidance/coronavirus-covid-19-information-for-the-public> (assessed

143 May 20, 2020) that around 50,000 key workers are tested daily, suggesting a daily probability  
144 of testing people without symptoms  $p_{as}$  of 0.00075. The daily probability of testing people  
145 with symptoms  $p_s$  was fitted during the calibration.

146  
147 We assumed a delay of one day to receive the test result and once an individual tested positive,  
148 they were immediately isolated for 14 days. In the model, this isolation reduced their  
149 infectiousness by 90%.

### 150 151 *Testing, contact-tracing +isolation (TTI) from June 2020*

152  
153 The UK Government started a large scale contact-tracing strategy from 1<sup>st</sup> June to coincide  
154 with reopening of schools, after initially trialling it on the Isle of Wight. We incorporated this  
155 on our analysis, and simulate two scenarios for the coverage of the tracing strategy. At the  
156 briefing by policy decision makers on 19<sup>th</sup> June 2020 it was suggested that 75% of those  
157 diagnosed positive are contacted [7] and 90% of their contacts are traced [8], implying a tracing  
158 level of 68%. We have simulated this as one scenario. In addition, we have also simulated a  
159 more pessimistic coverage of the tracing strategy and assumed this to be 40%. We feel these  
160 represent reasonable lower and upper bound, with the pessimistic scenario being based on  
161 preliminary results from tracing in the Isle of Wight<sup>3</sup>, while the more optimistic 68% resembles  
162 the reported tracing coverage by policy decision makers. The time taken to identify and notify  
163 contacts was set to immediate for house contacts, 1 days for school and work contacts and 2  
164 days for within the community contacts.

165  
166 Aligned with the government strategy from June 2020, within the model, tracing is of contacts  
167 of people tested positive for infection i.e. of diagnosed people. From June 2020, we simulated  
168 daily probability of testing of symptomatic people, while continuing to test a small proportion  
169 of asymptomatic people (e.g. NHS workers or other essential workers) and isolate the positive  
170 cases in combination with tracing of contacts of those tested positive and asking them to self-  
171 isolate.

### 172 173 *Model Calibration*

174  
175 The model comes with a set of default parameters derived from literature searches, but  
176 calibration was required to adjust these to the UK context. We used parameter inference with  
177 the Optuna framework (<https://optuna.org>) for automated parameter optimisation and  
178 optimised four models parameters to match the UK epidemic in terms of confirmed COVID-  
179 19 cases and deaths associated with COVID-19 between 21/01/2020 and 16/06/2020.

180  
181 Specifically, the parameter inference was on the number of seeded infectious individuals in  
182 the model (pop\_infected), the per-contact transmission risk ( $\beta$ ) and the parameters describing  
183 the proportion of symptomatic people that are tested ( $p_s$ ) in May and in June (until 16/06/2020  
184 inclusive). We determined values of these parameters for which we could match the model's  
185 projections of cumulative deaths and cumulative diagnosis between 21/01/2020 and  
186 16/06/2020 to the reported COVID-19 cases and deaths in the UK as described above. In Figure  
187 1 we show the best fit calibration for cases and deaths when simulating the model until

---

<sup>3</sup> As of 14/05/20 there have been 52,250 unique downloads of the tracing app at the Isle of Wight by residents and population is 141,538, implying 36.9% coverage.

188 16/06/2020 and the calibration script is available in [https://github.com/Jasminapg/Covid-19-](https://github.com/Jasminapg/Covid-19-Analysis)  
 189 [Analysis](https://github.com/Jasminapg/Covid-19-Analysis) .

190

191 *Modelling different transmissibility level in under 20 years old*

192

193 Given uncertainties about the role of different age groups in transmission, we explored how  
 194 varying the transmission among children and young people compared to adults would alter our  
 195 results. We did this by changing the infectiousness of anyone under 20 years old to be 50% or  
 196 100% of the infectiousness of adults.

197

198 To simulate this, we set the parameter  $p_{sus}$  in Table S2 for those aged 0-19 years old to be 0.5  
 199 instead of 1.0 and we recalibrated the model varying the values of  $\beta$ , and  $p_s$  for May and June  
 200 and initial number of infectious people during calibration. We then repeated the analysis from  
 201 the main manuscript, forecasting the number of new COVID-19 infections, deaths associated  
 202 with COVID-19 and the effective reproduction number R over time.

203

| <b>Calibration of the model when kids' transmissibility is 100% that of adults</b> |          |
|------------------------------------------------------------------------------------|----------|
| Initial seeding of infectious persons on 21/02/2020                                | 1500     |
| $\beta$                                                                            | 0.005938 |
| $p_s$ in March                                                                     | 0.009    |
| $p_s$ in April                                                                     | 0.012    |
| $p_s$ in May                                                                       | 0.0198   |
| $p_s$ in June (01/06/2020-16/06/2020)                                              | 0.0198   |
| $p_{as}$ in May and June                                                           | 0.00075  |
| <b>Calibration of the model when kids transmissibility is 50% that of adults</b>   |          |
| Initial seeding of infectious persons on 21/02/2020                                | 2200     |
| $\beta$                                                                            | 0.00629  |
| $p_s$ in March                                                                     | 0.009    |
| $p_s$ in April                                                                     | 0.012    |
| $p_s$ in May                                                                       | 0.029    |
| $p_s$ in June (01/06/2020-16/06/2020)                                              | 0.029    |
| $p_{as}$ in May and June                                                           | 0.00075  |

204

205 **Table S1: Parameters fitted during the calibration.**

206

**Disease Duration Parameters**

| Parameter | Description                                                                                          | Distribution (mean, std)               | Source                                                                                                                                   |
|-----------|------------------------------------------------------------------------------------------------------|----------------------------------------|------------------------------------------------------------------------------------------------------------------------------------------|
| $s$       | Length of time after exposure before an individual is infectious (i.e. has begun viral shedding)     | $s \sim \text{lognormal} (4.6, 4.8)$   | Lauer et al., 2020 <sup>23</sup> , Du et al., 2020 <sup>24</sup> , Nishiura et al., 2020 <sup>19</sup> , Pung et al., 2020 <sup>25</sup> |
| $i_1$     | Length of time after viral shedding has begun before an individual has symptoms                      | $i_1 \sim \text{lognormal} (1, 0.9)$   | Linton et al., 2020 <sup>26</sup> , Lauer et al., 2020 <sup>23</sup>                                                                     |
| $i_2$     | Length of time after symptoms appear before they become severe and the person requires critical care | $i_2 \sim \text{lognormal} (6.6, 4.9)$ | Linton et al., 2020 <sup>26</sup>                                                                                                        |
| $i_3$     | Length of time after severe symptoms appear before the person requires critical care                 | $i_3 \sim \text{lognormal} (3, 7.4)$   | Wang et al., 2020 <sup>27</sup>                                                                                                          |



|       |                                      |                                      |                                   |
|-------|--------------------------------------|--------------------------------------|-----------------------------------|
| $r_a$ | Recovery time for asymptomatic cases | $r_a \sim \text{lognormal}(8, 2)$    | Wölfel et al., 2020 <sup>28</sup> |
| $r_m$ | Recovery time for mild cases         | $r_m \sim \text{lognormal}(8, 2)$    | Wölfel et al., 2020 <sup>28</sup> |
| $r_s$ | Recovery time for severe cases       | $r_s \sim \text{lognormal}(14, 2.4)$ | Verity et al., 2020 <sup>29</sup> |
| $r_c$ | Recovery time for critical cases     | $r_c \sim \text{lognormal}(14, 2.4)$ | Verity et al., 2020 <sup>29</sup> |

207  
208  
209  
210

**Table S2:** Disease duration parameters, in days, used in simulations. This table is modified from [1], which describes the Covasim model in more detail.

**Age-linked Disease Parameters**

| Parameter   | 0-9     | 10-19   | 20-29   | 30-39   | 40-49   | 50-59   | 60-69   | 70-79   | 80+     |
|-------------|---------|---------|---------|---------|---------|---------|---------|---------|---------|
| $p_{sus}$   | 0.34    | 0.67    | 1.00    | 1.00    | 1.00    | 1.00    | 1.00    | 1.24    | 1.47    |
| $p_{sym}$   | 0.50    | 0.55    | 0.60    | 0.65    | 0.70    | 0.75    | 0.80    | 0.85    | 0.90    |
| $p_{sev}$   | 0.0005  | 0.0065  | 0.0072  | 0.0208  | 0.03430 | 0.0765  | 0.1328  | 0.2066  | 0.2457  |
| $p_{cri}$   | 0.00003 | 0.00008 | 0.00036 | 0.00104 | 0.00216 | 0.00933 | 0.03639 | 0.08923 | 0.1742  |
| $p_{death}$ | 0.00002 | 0.00006 | 0.00030 | 0.00080 | 0.00150 | 0.00600 | 0.02200 | 0.05100 | 0.09300 |
| $\beta$     | 1.00    | 1.00    | 1.00    | 1.00    | 1.00    | 1.00    | 1.00    | 1.00    | 1.00    |

211 **Table S3:** Age-linked disease parameters used in simulations. This table is borrowed from [1]  
212 describes the Covasim model in more detail. Key:  $p_{sus}$ : odds ratio of developing symptoms;  
213  $p_{sym}$ : probability of developing symptoms;  $p_{sev}$ : probability of developing severe symptoms  
214 (i.e., sufficient to justify hospitalization);  $p_{cri}$ : probability of developing into a critical case (i.e.,  
215 sufficient to require ICU);  $p_{death}$ : probability of death. Susceptibility values are derived from  
216 Zhang et al.<sup>13</sup>; all other values are derived from Verity et al.<sup>29</sup> and Ferguson et al.<sup>2</sup>. In the  
217 Supplementary Material, we explore variability in the transmissibility  $\beta$  of those under 20 by  
218 setting  $\beta$  to 0.50 for age groups 0-9 and 10-19.

219

| Scenario           | 40% of contacts tracing |                 | 68% of contact tracing |                 |
|--------------------|-------------------------|-----------------|------------------------|-----------------|
|                    | $p_s$                   | % testing level | $p_s$                  | % testing level |
| Fully in September | 0.18                    | 87%             | 0.13                   | 75%             |
| Rota in September  | 0.13                    | 75%             | 0.1                    | 65%             |

220 **Table S4:** Parameters used to generate results in Figures 2-4 in the main text, showing the  
221 daily probability of symptomatic testing ( $p_s$ ) to avoid secondary pandemic wave when  
222 transmissibility is the same across all ages.

223  
224

| Scenario           | 40% of contacts tracing |                 | 68% of contact tracing |                 |
|--------------------|-------------------------|-----------------|------------------------|-----------------|
|                    | $p_a$                   | % testing level | $p_{as}$               | % testing level |
| Fully in September | 0.143                   | 78%             | 0.09                   | 61%             |
| Rota in September  | 0.115                   | 70%             | 0.085                  | 59%             |

225 **Table S5:** Parameters used to generate results in Figures S2-S4 in the main text, showing the  
226 daily probability of asymptomatic testing ( $p_s$ ) to avoid secondary pandemic wave when under  
227 20 years old transmissibility is 50% that of other ages

228

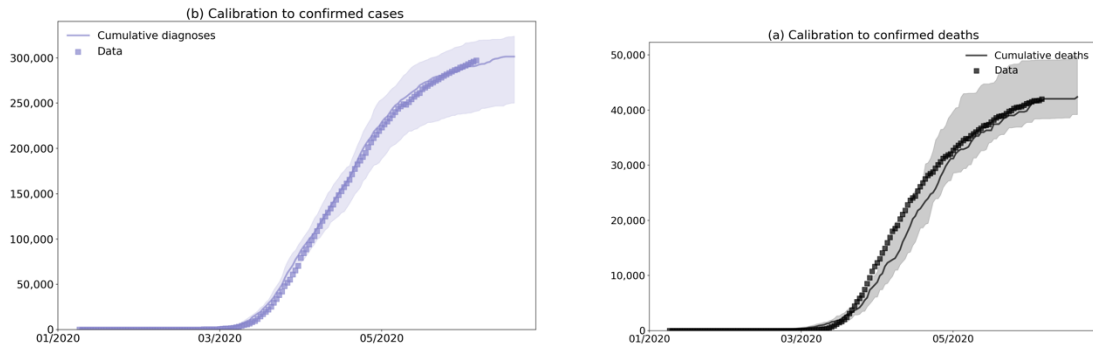

229  
230  
231  
232  
233

Figure S1: Model calibration when children’s transmissibility is the same as that of adults.

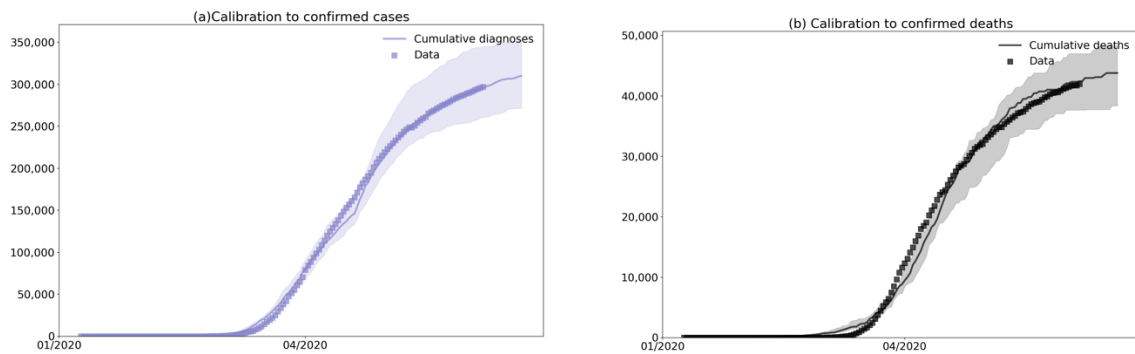

234  
235  
236  
237

Figure S2: Model calibration when under 20 years old transmissibility is half that of other ages.

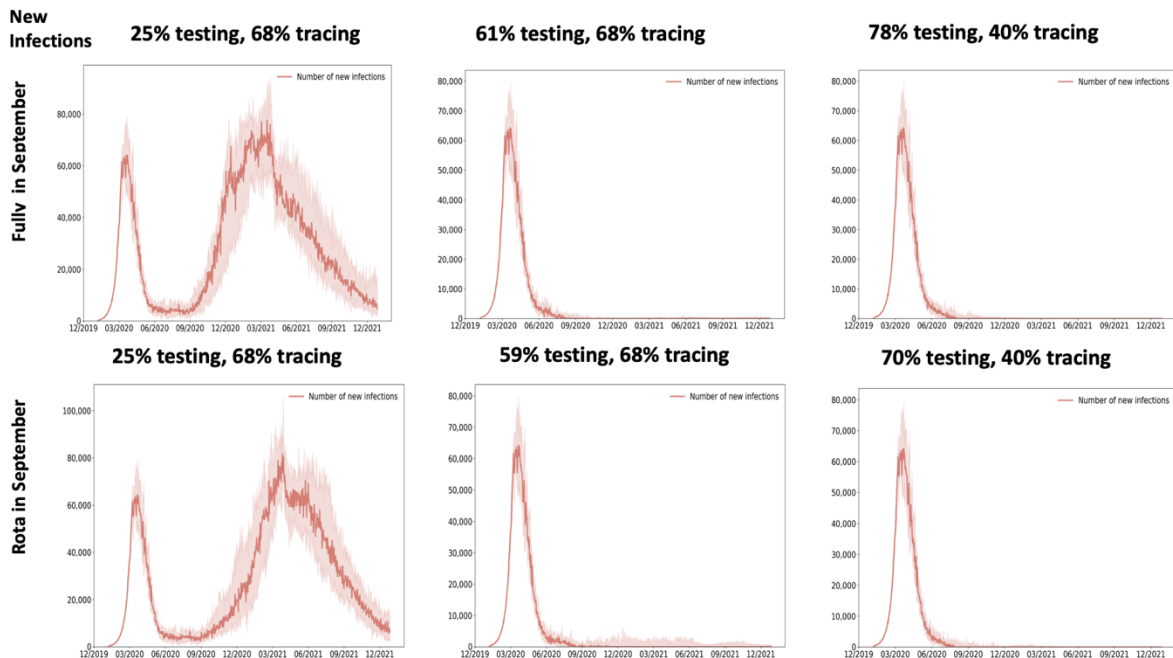

238  
239  
240  
241  
242

Figure S3: Model estimates of daily new COVID-19 infections over 21 January 2020 and 31 December 2021 across different school and society reopening scenarios in the presence of different test-trace-isolate (TTI) strategies, with infectiousness of under 20 years old set to 50%



243 of that of older ages. Medians across ten simulations are indicated by solid red lines and 10%  
 244 and 90% quantiles by red shading.  
 245  
 246

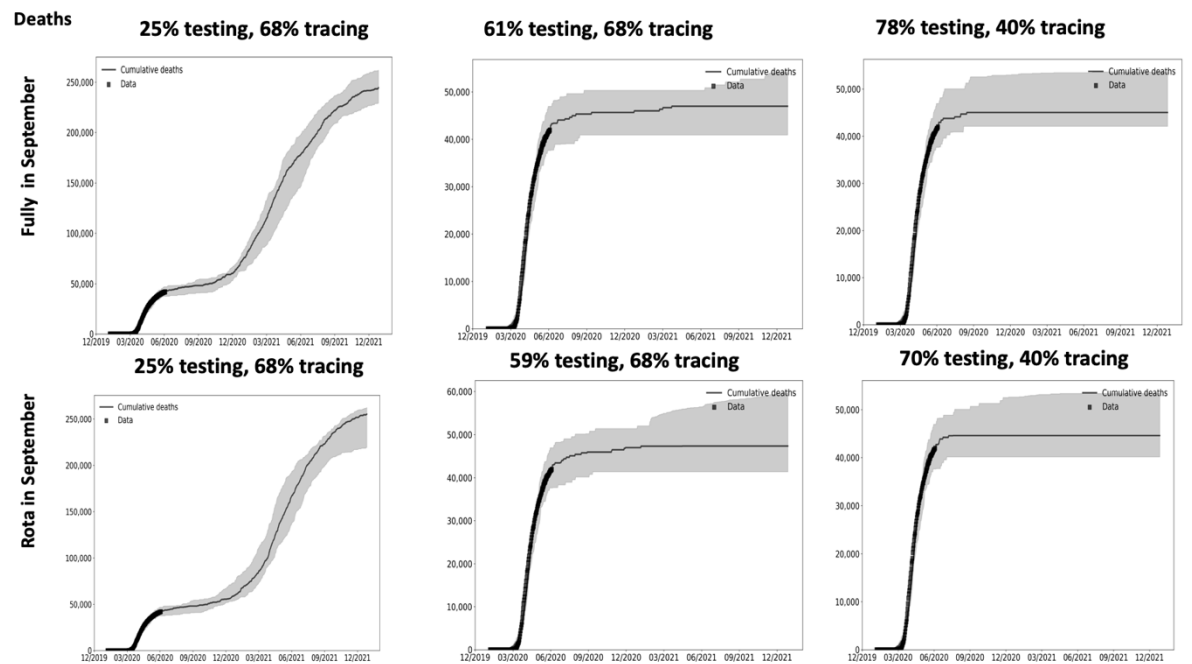

247  
 248  
 249 **Figure S4:** Model estimates of cumulative COVID-19 deaths over 21 January 2020 and 31  
 250 December 2021 across different school and society reopening scenarios in the presence of  
 251 different test-trace-isolate (TTI) strategies, with infectiousness of under 20 years old set to 50%  
 252 of that of older ages. Medians across ten simulations are indicated by solid black lines and 10%  
 253 and 90% quantiles by grey shading.  
 254

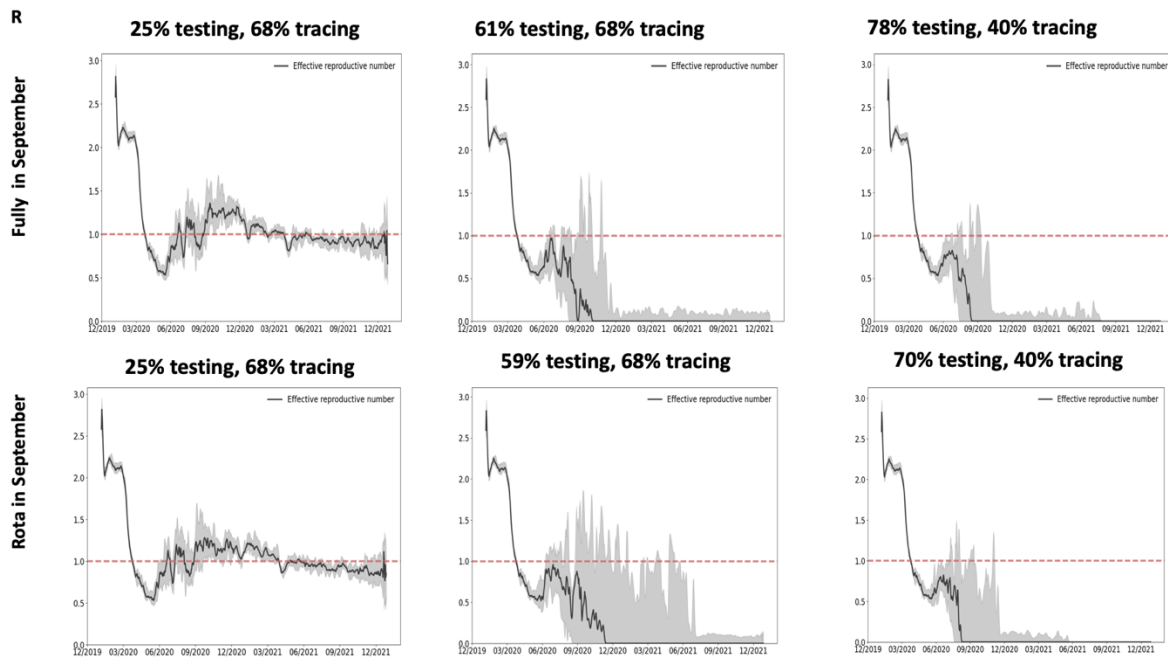

255  
 256

257 Figure S5: Model estimates of the effective reproduction number  $R$  over 21 January 2020 and  
258 31 December 2021 across different school and society reopening scenarios in the presence of  
259 different test-trace-isolate (TTI) strategies, with infectiousness of under 20 years old set to 50%  
260 of that of older ages. Medians across ten simulations are indicated by solid black lines and 10%  
261 and 90% quantiles by grey shading.

262

## 263 References

264

265 [1] Kerr CC, Stuart R, Mistry D, et al. Covasim: an agent based model of COVID-19  
266 dynamics and interventions. Preprint available on medRxiv

267 <https://www.medrxiv.org/content/10.1101/2020.05.10.20097469v1>

268 [2] UK demographic data, assessed 15/05/2020.

269 <https://www.ons.gov.uk/peoplepopulationandcommunity/populationandmigration/population>  
270 [estimates/articles/ukpopulationpyramidinteractive/2020-01-08](https://www.ons.gov.uk/peoplepopulationandcommunity/populationandmigration/population)

271 [3] Panovska-Griffiths, J. Coronavirus: BMJ study suggests 78% don't show symptoms –  
272 here's what that could mean. The Conversation, April 7 2020.

273 [https://theconversation.com/coronavirus-bmj-study-suggests-78-dont-show-symptoms-heres-](https://theconversation.com/coronavirus-bmj-study-suggests-78-dont-show-symptoms-heres-what-that-could-mean-135732)  
274 [what-that-could-mean-135732](https://theconversation.com/coronavirus-bmj-study-suggests-78-dont-show-symptoms-heres-what-that-could-mean-135732)

275 [4] Oxford Centre for Evidence Based Medicine, [https://www.cebm.net/covid-19/covid-19-](https://www.cebm.net/covid-19/covid-19-what-proportion-are-asymptomatic/)  
276 [what-proportion-are-asymptomatic/](https://www.cebm.net/covid-19/covid-19-what-proportion-are-asymptomatic/), assessed 26/04/2020.

277 [5] N.M. Ferguson, D. Laydon, et al. Report 9: Impact of non-pharmaceutical interventions  
278 (NPIs) to reduce COVID-19 mortality and healthcare demand, preprint available at

279 [https://spiral.imperial.ac.uk:8443/bitstream/10044/1/77482/14/2020-03-16-COVID19-](https://spiral.imperial.ac.uk:8443/bitstream/10044/1/77482/14/2020-03-16-COVID19-Report-9.pdf)  
280 [Report-9.pdf](https://spiral.imperial.ac.uk:8443/bitstream/10044/1/77482/14/2020-03-16-COVID19-Report-9.pdf)

281 [6] Tracing strategy article, The Guardian, assessed 20/05/2020.

282 [https://www.theguardian.com/politics/2020/may/04/contact-tracing-app-to-be-piloted-on-](https://www.theguardian.com/politics/2020/may/04/contact-tracing-app-to-be-piloted-on-isle-of-wight-this-week-matt-hancock-says)  
283 [isle-of-wight-this-week-matt-hancock-says](https://www.theguardian.com/politics/2020/may/04/contact-tracing-app-to-be-piloted-on-isle-of-wight-this-week-matt-hancock-says)

284 [5] Coronavirus (COVID-19) in the UK, <https://coronavirus.data.gov.uk>

285 [6] Coronavirus (COVID-19) Scaling up our testing programme, Department of Health and  
286 Social care, published 02/04/2020. Assessed 26/04/2020.

287 [https://assets.publishing.service.gov.uk/government/uploads/system/uploads/attachment\\_data](https://assets.publishing.service.gov.uk/government/uploads/system/uploads/attachment_data/file/878121/coronavirus-covid-19-testing-strategy.pdf)  
288 [/file/878121/coronavirus-covid-19-testing-strategy.pdf](https://assets.publishing.service.gov.uk/government/uploads/system/uploads/attachment_data/file/878121/coronavirus-covid-19-testing-strategy.pdf)

289 [7] Boseley S. Contact tracers in England get no data from 26% of people with coronavirus.  
290 June 18, 2020. [https://www.theguardian.com/world/2020/jun/18/contact-tracers-in-england-](https://www.theguardian.com/world/2020/jun/18/contact-tracers-in-england-get-no-data-from-26-of-people-with-coronavirus)  
291 [get-no-data-from-26-of-people-with-coronavirus](https://www.theguardian.com/world/2020/jun/18/contact-tracers-in-england-get-no-data-from-26-of-people-with-coronavirus) (assessed 20/05/2020)

292 [8] Trigg N. Coronavirus: One in four infected by virus cannot be reached. June 18,2020.

293 [https://www.bbc.co.uk/news/health-](https://www.bbc.co.uk/news/health-53009775?intlink_from_url=https://www.bbc.co.uk/news/topics/ck219qxx17nt/coronavirus-testing&link_location=live-reporting-story)

294 [53009775?intlink\\_from\\_url=https://www.bbc.co.uk/news/topics/ck219qxx17nt/coronavirus-](https://www.bbc.co.uk/news/health-53009775?intlink_from_url=https://www.bbc.co.uk/news/topics/ck219qxx17nt/coronavirus-testing&link_location=live-reporting-story)  
295 [testing&link\\_location=live-reporting-story](https://www.bbc.co.uk/news/health-53009775?intlink_from_url=https://www.bbc.co.uk/news/topics/ck219qxx17nt/coronavirus-testing&link_location=live-reporting-story) (assessed 20/05/2020)
